# Supplementary material for: NFAT5 Controls the Integrity of Epidermis
Source: PubMed Central journal article supplement (PMC8696207; doi:10.3389/fimmu.2021.780727), 2021-12-09
Supplement: Table_1.pdf [file Table_1.pdf]

## Supplementary Materials

**Supplementary Table 1.** List of primers used in qRT-PCR assays

| Genes         | Forward                      | Reverse                    |
|---------------|------------------------------|----------------------------|
| <i>ActB</i>   | CTCTGGCTCCTAGCACCATGAAG<br>A | GTAAAACGCAGCTCAGTAACAGTCCG |
| <i>B2m</i>    | CTGCTACGTAACACAGTTCCACC<br>C | CATGATGCTTGATCACATGTCTCG   |
| <i>Asprv1</i> | ATGCCCTGGATGTCTACAAT         | CATGCTGTTGGCAAACAAAA       |
| <i>Cnfn</i>   | TGAGAGTTCGTCTCCCCCAG         | ACTGGATATGACATGGCTTTGC     |
| <i>Cdh2</i>   | CACGCACACGCGTGACACA          | CGGACTCGCACCCAGGAGTAA      |
| <i>Cdkn2a</i> | TGGTCACTGTGAGGATTCAGC        | TTGCCCATCATCATCACCTGG      |
| <i>Mmp3</i>   | GTCCCTCTATGGA ACTCCCAC       | AGTCCTGAGAGATTTGCGCC       |
| <i>Fn1</i>    | CGAAGAGCCCTTACAGTTCCA        | ATCTGTAGGCTGGTTCAGGC       |
| <i>Sprr1b</i> | TGTCCTCCATATAACCAGGCTCA      | GAGACACATGGCTCAGGAGG       |
| <i>Sprr2d</i> | CCGAGACTACTTTGGAGAACCC       | GGCTCTGGGCATTTTGA          |
| <i>S100a9</i> | TTTAGCCTTGAGCAAGAAGATGG      | AGGGTGTCAGGGTGCCTTC        |
| <i>S100a8</i> | TGACTTCAAGAAAATGGTCA         | CCACTTTTATCACCATCGCA       |
| <i>Sprr2b</i> | TGGCAGCCAAAATGCCCTCC         | TGTTGCTATGGAGTTGGTGA       |
| <i>Krtdap</i> | AACAGAGGGCCTTAACAATG         | TAGGGAAGAAGTCCCAGTTA       |
| <i>Sprr2d</i> | TGTCCTGAGCCATGTCCCCC         | ATTCTCTTCTTTCCCTTTG        |
| <i>Sprr2i</i> | TACCAGCAGAAATGCCCTCC         | TTGTTGCTATGGAGGCATGT       |
| <i>Tgm1</i>   | CGGGGTGGCCGAAGACCCGA         | GTGTGGTGCTCTCGGCGGTT       |
| <i>Tgm2</i>   | CGGCCCAGATCCCAGTGAAG         | CATTGGCTGGGGTGCAGAGC       |
| <i>Krt5</i>   | TCTGCCATCACCCCATCTGT         | CCTCCGCAGAACTGTAGGA        |
| <i>Krt14</i>  | AGCGGCAAGAGTGAGATTTCT        | CCTCCAGGTTATTCTCCAGGG      |
| <i>Lcn2</i>   | ATGTCACCTCCATCCTGGTCAG       | GCCACTTGCACATTGTAGCTCTG    |
| <i>Klk7</i>   | TGCAAAATGCGTCAGTACCA         | GACCTGGGTCTTTGTGGAGT       |
| <i>Krt8</i>   | TGGAAGGACTGACCGACGAGAT       | GGCACGAACTTCAGCGATGATG     |
| <i>Krt18</i>  | AATCAGGGACGCTGAGACCACA       | GCTCCATCTGTGCCTTGTATCG     |
