# Supplementary material for: NFAT5 Controls the Integrity of Epidermis
Source: PubMed Central journal article supplement (PMC8696207; doi:10.3389/fimmu.2021.780727), 2021-12-09
Supplement: Table_2.pdf [file Table_2.pdf]

**Supplementary Table 2.** List of TF genes whose expression was changed 2fold in KCs from tails of adult *Nfat5*<sup>-/-</sup> mice.

Genes whose expression was enhanced 2fold and more:

| Gene          | Protein                                | Function in Epidermis/Skin                                                                                                                                                                                                                                                                                      | Refs.        |
|---------------|----------------------------------------|-----------------------------------------------------------------------------------------------------------------------------------------------------------------------------------------------------------------------------------------------------------------------------------------------------------------|--------------|
| <i>Barx2</i>  | BarH-like homeobox 2 Factor            | Transcriptional repressor that regulates hair follicle remodelling.                                                                                                                                                                                                                                             | (37)         |
| <i>Foxn1</i>  | Forkhead box N1<br>Whn                 | Nude mice: skin disorder congenital alopecia, and nail dystrophy.<br>Foxn1 drives skin healing via engagement in re-epithelization and the epithelial-mesenchymal transition (EMT) process (Mmp9 as target gene).                                                                                               | (39)<br>(50) |
| <i>Mxd1</i>   | MAX dimerization protein 1<br>MAD1     | Antagonizes Myc activity. Highly expressed in epidermal KCs.<br>Mad:Max complexes are detected during differentiation and appear to replace the Myc:Max complexes present in proliferating keratinocytes and other cells.                                                                                       | (33)         |
| <i>Sox11</i>  | SRY-box TF11                           | Dictates embryonic epidermal state, reactivation of embryonic genes during wound repair.<br>Peripheral neuron regeneration.                                                                                                                                                                                     | (40)         |
| <i>Hopx</i>   | HOP homeobox                           | Transcriptional co-factor, does not bind to DNA.<br>Positive regulator of late KC differentiation.<br>Marker for a subset of multipotent hair follicle stem cells.                                                                                                                                              | (34)         |
| <i>Grhl3</i>  | Grainyhead like transcription factor 3 | Mouse skin lacking Grhl3 showed increased infiltration of mast cells and pro-inflammatory T cells, increased expression of the pro-proliferative/pro-inflammatory markers CD3 and pSTAT3, and significantly elevated basal KC proliferation.<br>GRHL3 regulates barrier formation during epidermal development. | (35)         |
| <i>Klf10</i>  | Krüppel-like factor 10                 | Suppressor of KC proliferation and apoptosis.<br>p21 <sup>WAF</sup> is a downstream target. Tumor-Suppressor.                                                                                                                                                                                                   | (36)         |
| <i>Egr1</i>   | Early growth response 1                | Upregulation in psoriatic skin lesions by IL-17A, binding to the psoriasin (S100A7) promoter.<br>Early induced gene in wounded KCs.                                                                                                                                                                             | (42)         |
| <i>Zfp750</i> | Zinc finger protein 750                | Role inf seborrhea-like dermatitis with psoriasiform elements. Selective expression in KCs.                                                                                                                                                                                                                     | (43)         |

Gene whose expression was decreased 2fold and more:

|             |                                |                                               |      |
|-------------|--------------------------------|-----------------------------------------------|------|
| <i>Irf9</i> | Interferon regulatory factor 9 | Highly expressed in psoriatic lesions of skin | (44) |
|-------------|--------------------------------|-----------------------------------------------|------|
